# Supplementary material for: Ultrasonic Heating Detects Lipiodol Deposition within Liver Tumors after Transarterial Embolization: An In Vivo Approach
Source: MDPI journal article supplement (doi:10.3390/biology10090901), 2021-09-12
Supplement: s1 [file s1]

**Table S1.** Specification of the two transducers for heating and measurement.

| Usage       | Resonant Frequency [MHz] | Diameter [mm] | Focal Distance [mm] |
|-------------|--------------------------|---------------|---------------------|
| Heating     | 5.0                      | 12.0          | 12.0                |
| Measurement | 10.0                     | 4.0           | 12.0                |

**Table S2.** Parameters of the transmitted ultrasonic waves used for heating.

|            | Frequency [MHz] | Positive and Negative Sound Pressure [MPa] | $I_{SPTA}$ [mW/cm <sup>2</sup> ] | Wave Duration [ms] | Interval of Exposure [s] | Number of Exposures |
|------------|-----------------|--------------------------------------------|----------------------------------|--------------------|--------------------------|---------------------|
| Burst Wave | 5.0             | 0.60, -0.51                                | 51                               | 10.0               | 2.0                      | 100                 |

I: Intensity, SPPA: Spatial Peak Pulse Average.

**Table S3.** Parameters of the transmitted ultrasonic waves used for measurement.

| Transmitted Wave Type | Center Frequency [MHz] | Pulse Duration [ms] | Pulse Repetition Time[ms] |
|-----------------------|------------------------|---------------------|---------------------------|
| Periodic Pulsed Wave  | 10                     | <0.5                | 1.0                       |

**Table S4.** Parameters of setup values for calculation of sound velocity change.

| Rectangular Window Size[ns] | Window Shift Interval[ns] | Frequency of Quadrature Detection [MHz] | Number of Window Shifts |
|-----------------------------|---------------------------|-----------------------------------------|-------------------------|
| 619                         | 313                       | 10                                      | 20                      |
